# Supplementary material for: Exploration of graphene oxide as an intelligent platform for cancer vaccines
Source: Royal Society of Chemistry journal article supplement (doi:10.1039/c5nr04986e), 2015-01-01

Movie legend: One representative movie showing the adsorption process of OVA protein onto graphene oxide. The green, silvery, blue and carmine sticks represent the hydrophilic, hydrophobic, basic and acidic residues, respectively.

Movie still image:

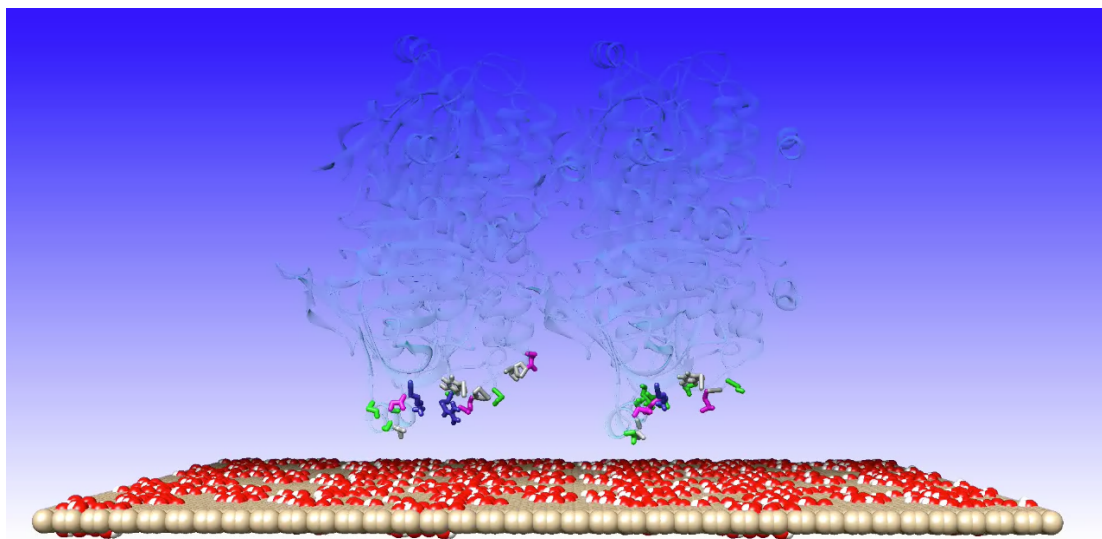

Supplement: c5nr04986e1.pdf [file c5nr04986e1.pdf]
